# Supplementary material for: Zeaxanthin remodels cytoplasmic lipid droplets via β3-adrenergic receptor signaling and enhances perilipin 5-mediated lipid droplet–mitochondrion interactions in adipocytes
Source: Royal Society of Chemistry journal article supplement (doi:10.1039/d2fo01094a), 2022-01-01
Supplement: d2fo01094a2.pdf [file d2fo01094a2.pdf]

## Supplementary files

**Table S1 Primer sequences used for the Real-time qPCR**

| <b>Primer name</b> | <b>Forward (5'-3')</b>  | <b>Reverse (5'-3')</b>         |
|--------------------|-------------------------|--------------------------------|
| Cyclin A           | TTATTGCTGGAGCTGCCTTT    | CTCTGGTGGGTTGAGGAGAG           |
| Cyclin D1          | AACTACCTGGACCGCTTCCT    | CCACTTGAGCTTGTTACCA            |
| Cdk2               | CCATTTTGCCAGAAATTCGT    | CATTCCTCTTCCCCTCATCA           |
| P21                | GACACCACTGGAGGGTGACT    | CAGGTCCACATGGTCTTCCT           |
| CPT-1a             | AGACAAGAACCCCAACATCC    | CAAAGGTGTCAAATGGGAAGG          |
| Hadha              | TGTCCCTGAAGTGTTGCTG     | GTCCCATTTTCTTTGCTCTGTC         |
| Etfdh              | GGATATTGAGAGGAATGGAGCC  | CAAAGCCACAGAGGATAAGAGG         |
| Acs15              | GCAGAAAATTGGGAAAGAGGG   | TTTCAGTGTCGGTGTGAGAAG          |
| Acaa2              | TGTTCTAAAGATGCTGAGGTCG  | TTGATCCGTTAATCCTGCCC           |
| Lpl                | AACAAGGTCAGAGCCAAGAG    | CCATCCTCAGTCCCAGAAAAG          |
| Ndufb8             | ACATCTCTTCGGCTTTGTGG    | CAGGCTCTTTGGTAGGATCAC          |
| Sdhd               | ACCCCTTCTCTGTCTACCG     | AATGCTCGCTTCTCCTTGTAG          |
| Dio2               | CCTCCTAGATGCCTACAAACAG  | TGATTCAGGATTGGAGACGTG          |
| Slc27a2            | ACATCTACTTCAACAGCGGAG   | ACAAAATCTACCAGTCCCACG          |
| Zfp516             | GGACATCACTAACAGGGACAC   | ACCGTCACACTCAAACACC            |
| Atf2               | TGAGAAATGAAGTGGCCCAG    | TTCTGTATGTGGACTGCTTGG          |
| Lsd1               | AGCTACAGAGTTTTGGGATGG   | GATTCCCTCCAAGACCTGTTAC         |
| Sncg               | GTTGTGGGTGCTGTAGAAAAG   | GCCTGCTCCTTGGTCTTC             |
| Gsn                | AGGTCTTTGTCTGGGTTGG     | TTTGCTGGATCTGTCTCGATG          |
| Rarres2            | ATAGTCCACTGCCCAATTCTG   | AGGGCTTATTTGGTTCTCAGG          |
| Uqcrc2             | TTCCAGTGCAGATGTCCAAG    | CTGTTGAAGGACGGTAGAAGG          |
| Cox1               | TTTTCAGGCTTCACCCTAGATGA | GAAGAATGTTATGTTTACTCCTACGAATAT |
|                    |                         | G                              |
| Atp5a              | CATTGGTGATGGTATTGCGC    | TCCCAAACACGACAACCTCC           |

**Table S2 List of Antibodies**

| Antibodies           | Source                    | Catalogue |
|----------------------|---------------------------|-----------|
| ATGL                 | Cell Signaling Technology | #2439     |
| phospho (Ser563)-HSL | Cell Signaling Technology | #4139     |
| HSL                  | Cell Signaling Technology | #4107     |
| MGL                  | Abclonal                  | A6654     |
| ABHD5                | Santa Cruz Biotechnology  | sc100468  |
| PLIN5                | Abclonal                  | A20418    |
| FSP27                | Abcam                     | ab213693  |
| RAB7                 | Cell Signaling Technology | #9367     |
| RAB18                | Abcam                     | ab224466  |
| $\beta$ 3-AR         | Abcam                     | ab94506   |
| CPT1a                | Cell Signaling Technology | #97361    |
| NDUFB8               | Abcam                     | ab192878  |
| $\beta$ -actin       | Abcam                     | ab8226    |

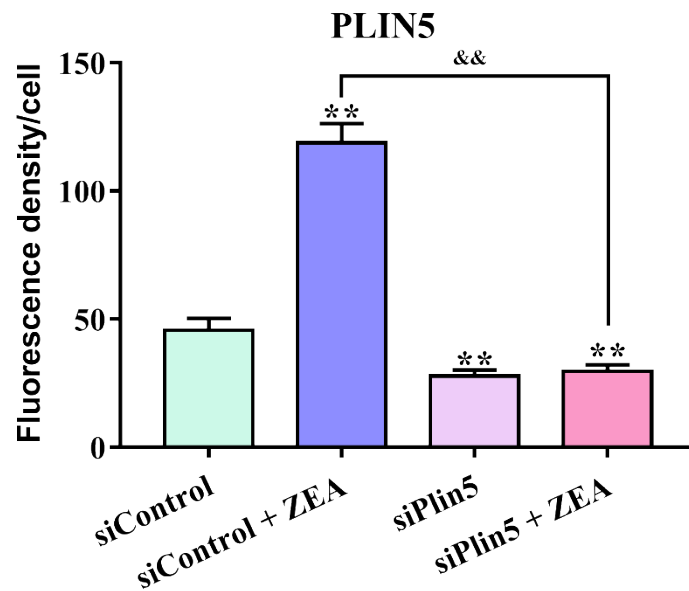

Fig. S1 Quantification of PLIN5-positive adipocytes ( $n = 3$ ). \*\* $p < 0.01$  vs. siControl group; && $p < 0.01$  siControl + ZEA group vs. siPlin5 + ZEA group.
